# Supplementary material
Source: PubMed Central journal article supplement (PMC3186334)
Supplement: supp_blood-2011-03-340364_Document1.pdf [file supp_blood-2011-03-340364_Document1.pdf]

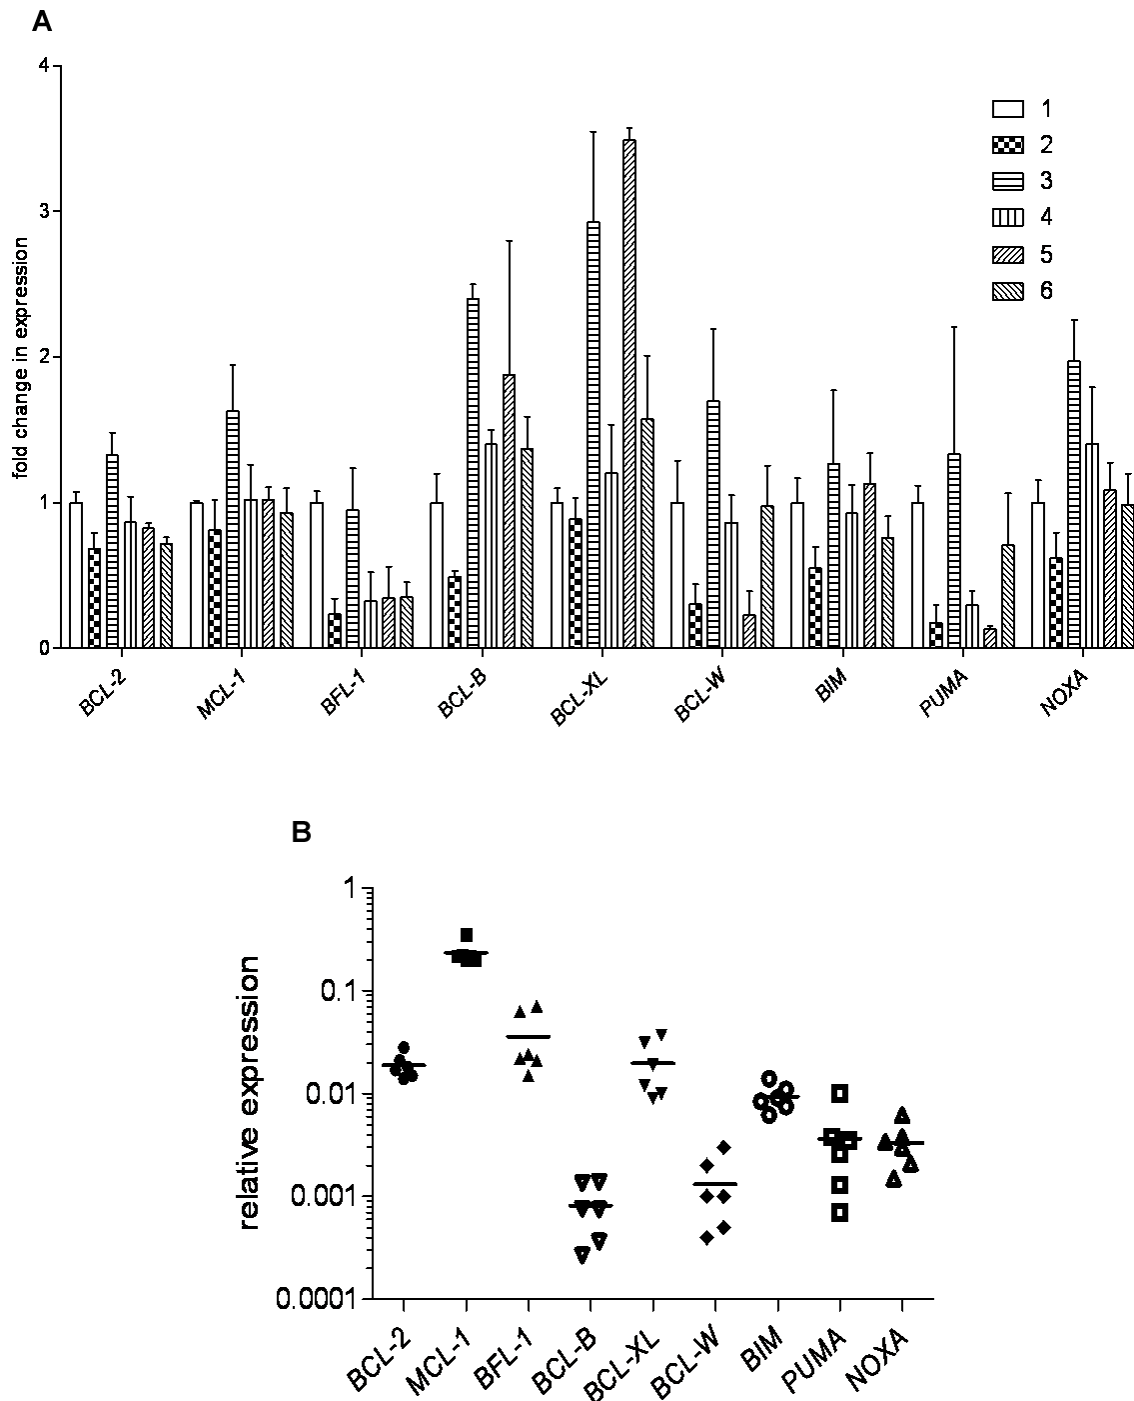

**Figure S1. BCL-2 family mRNA expression in lymphocytes isolated from healthy donors**  
 (A) mRNA levels of BCL-2 family members determined by quantitative RT-PCR normalized to those of the first healthy donor show similar expression for each *BCL-2* family transcript. (B) Bcl-2 family members have different basal levels normalized to  $\beta$ -ACTIN. Note the logarithmic scale used to reveal the large differences in the expression levels.

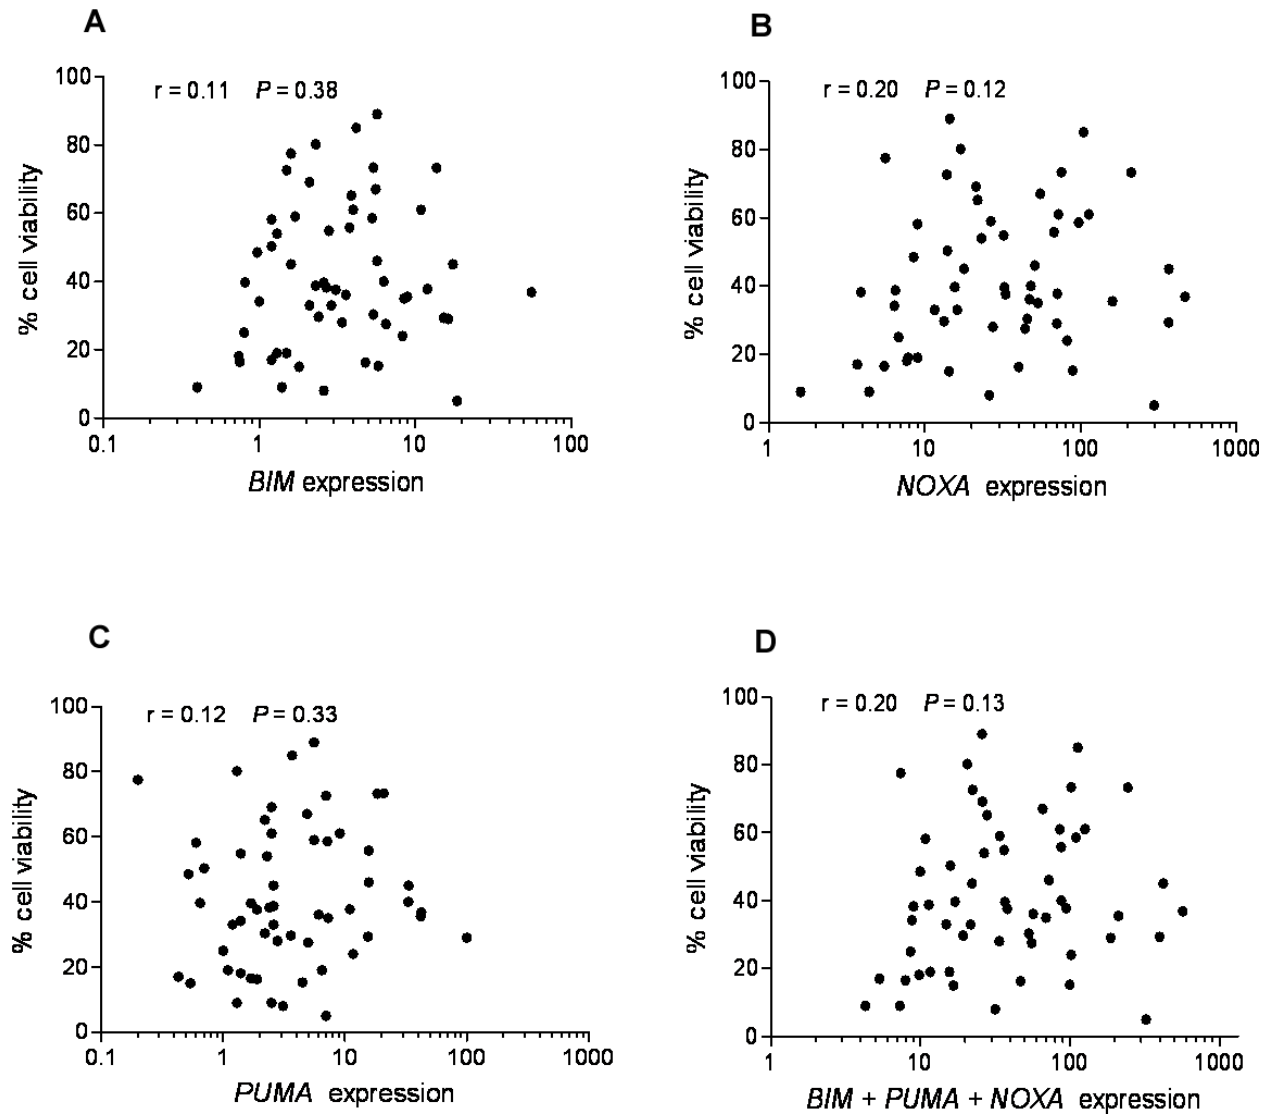

**Figure S2. Lack of linear correlation between RNA expressions of BH3-only Bcl-2 family members, individually or combined, and CLL response to ABT-737**

The expression value for each or the combined BH3-only mRNAs were plotted against cell viability after ABT-737 treatment. RNA expression levels were normalized to those found in lymphocytes isolated from six healthy donors for: (A) *BIM*, (B) *NOXA*, (C) *PUMA*, and (D) *BIM* + *NOXA* + *PUMA* expression. Spearman correlation ( $r$ ) and  $P$ -values are shown.

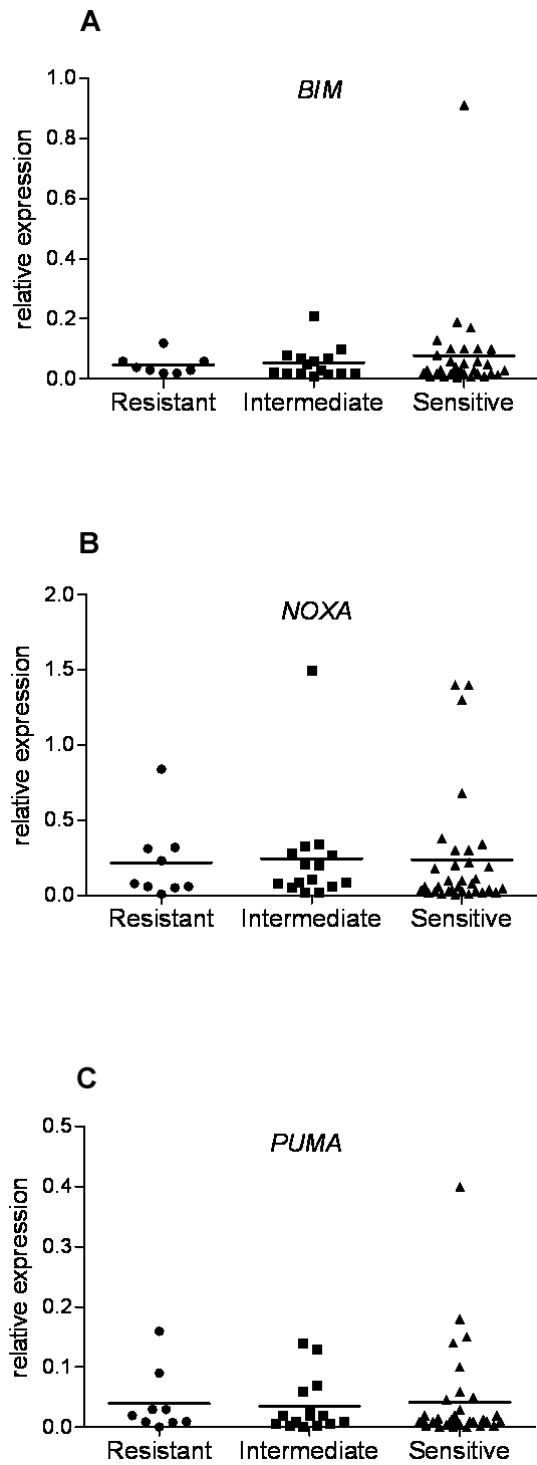

**Figure S3. BH3-only transcripts in the sensitive, intermediate, and resistant CLL groups**  
 Expression of BH3-only mRNAs determined by quantitative RT-PCR were normalized to  $\beta$ -actin for all CLL patient samples. (A) *BIM*, (B) *NOXA*, and (C) *PUMA* expression.

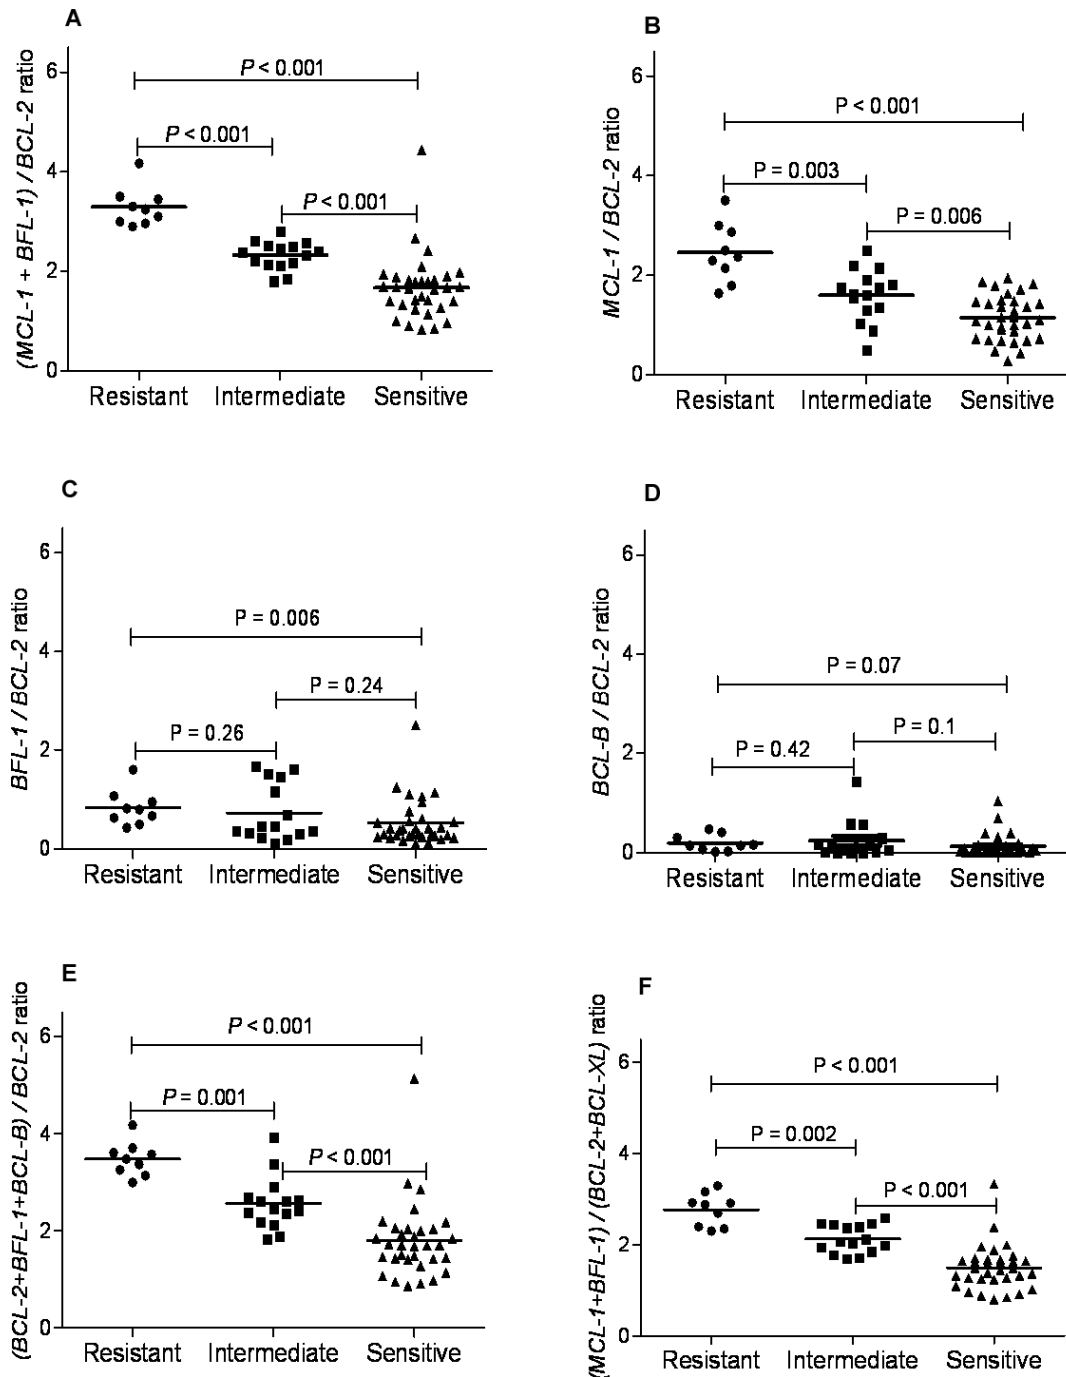

**Figure S4. The relative ratio of  $(MCL-1 + BFL-1)/BCL-2$  represents the most informative predictive marker for the ABT-737 sensitivity**

Relative expression values for: (A)  $(MCL-1 + BFL-1)/BCL-2$ , (B)  $MCL-1/BCL-2$ , (C)  $BFL-1/BCL-2$ , (D)  $Bcl-B/Bcl-2$ , (E)  $(Mcl-1 + Bfl-1 + Bcl-b)/Bcl-2$ , and (F)  $(Mcl-1 + Bfl-1)/(Bcl-2 + Bcl-xl)$ ,  $(Mcl-1 + Bfl-1)/Bcl-2$  are the most significant among the sensitive, intermediate, and resistant groups. P-values are indicated for comparison between groups.

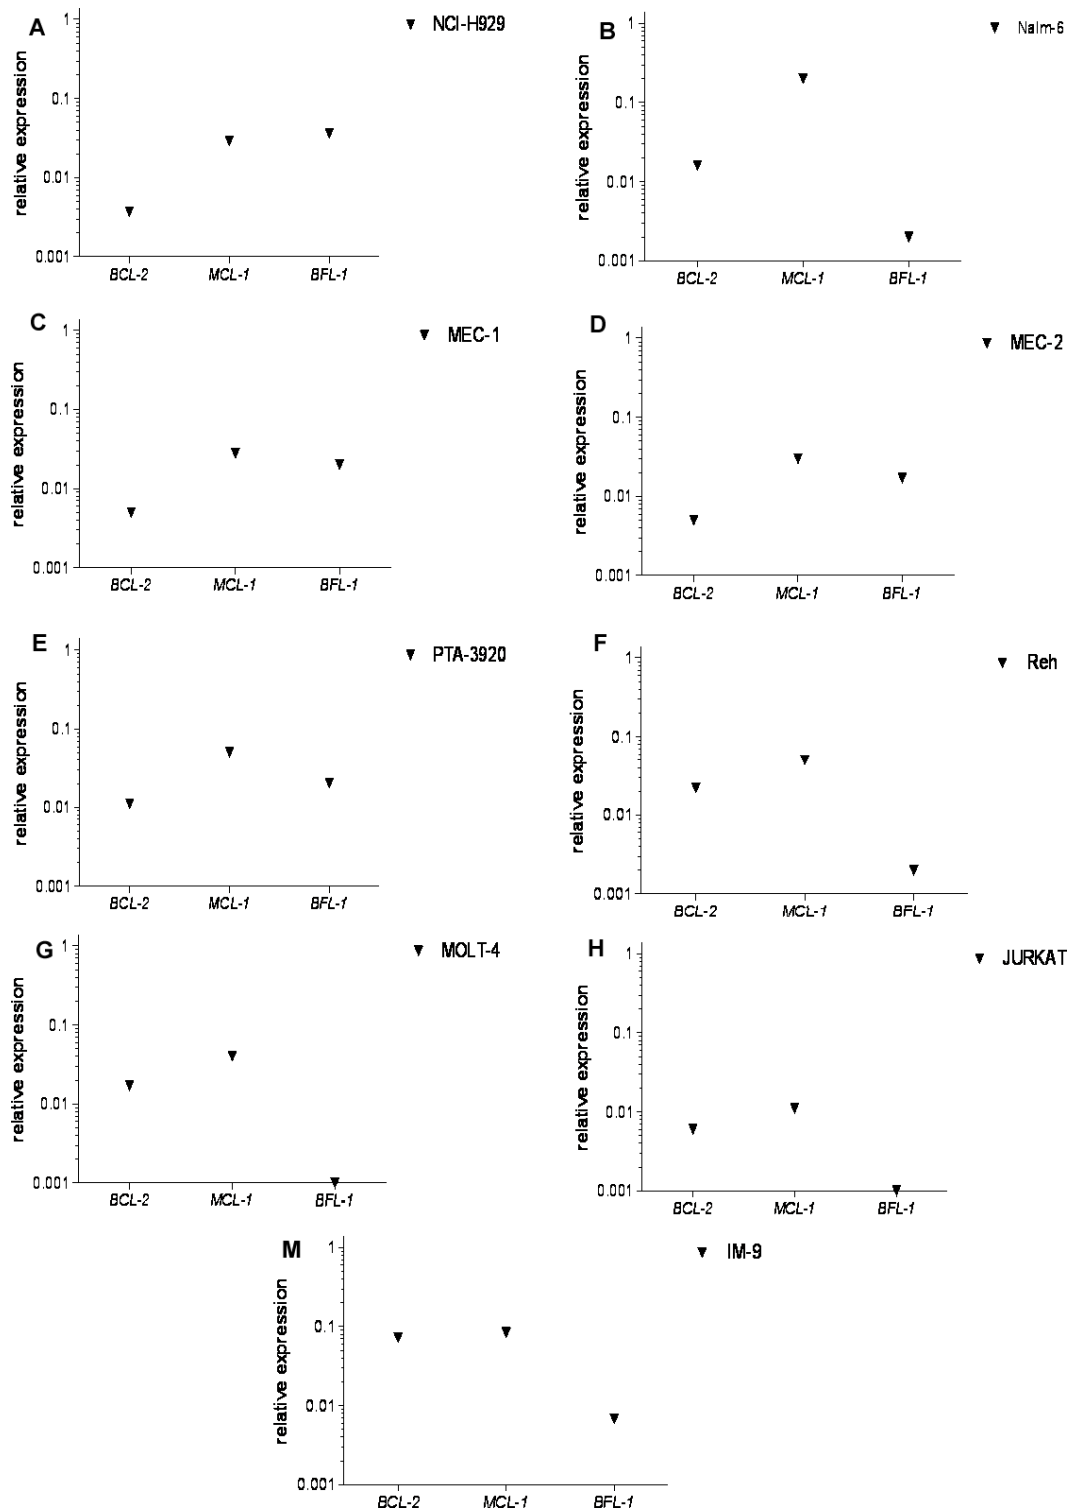

**Figure S5. Relative expression of *BCL-2*, *MCL-1* and *BFL-1* in a panel of leukemic cell lines** *BCL-2*, *MCL-1*, and *BFL-1* mRNA expression relative to  $\beta$ -ACTIN in (A) NCI-H929, (B) Nalm-6, (C) Mec-1, (D) Mec-2, (E) PTA-3920, (F) Reh, (G) Molt-4, (H) Jurkat, and (I) IM-9 cells.
